# Supplementary material for: Vasodilatory Peripheral Response and Pain Levels following Radiofrequency Stressor Application in Women with Fibromyalgia
Source: MDPI journal article supplement (doi:10.3390/biomedicines12010142), 2024-01-10
Supplement: s1 [file s1]

**Table S1.** Baseline, post radiofrequency data, and the changes produced in each group (95% confidence interval) for pain intensity, electrical pain threshold, electrical pain intensity and pressure pain threshold.

|                                    | Baseline    | Post-treatment (Post-radiofrequency) | Within-group<br>Cohen's d | Score change           |                         |
|------------------------------------|-------------|--------------------------------------|---------------------------|------------------------|-------------------------|
|                                    |             |                                      |                           | Within-group           | Between-group           |
| VAS (mm)                           |             |                                      |                           |                        |                         |
| Women with FM                      | 72.07±18.78 | 66.17±26.45                          | 0.26                      | 5.89 (-3.351, 15.140)  | 11.43 (-3.354, 26.208)  |
| Healthy control                    | 12.94±17.23 | 18.47±21.94                          | 0.28                      | -5.53 (-17.606, 6.542) |                         |
| Pain threshold electric score (mA) |             |                                      |                           |                        |                         |
| Women with FM                      | 5.60±3.73   | 3.82±0.99                            | 0.65                      | 1.78 (0.010, 3.556)    | 2.51 (0.338, 4.679)*    |
| Healthy control                    | 4.90±1.57   | 5.63±1.67                            | 0.45                      | -0.72 (-1.978, 0.527)  |                         |
| Pain electric score (mA)           |             |                                      |                           |                        |                         |
| Women with FM                      | 11.68±8.60  | 5.03±1.29                            | 1.08                      | 6.65 (2.870, 10.428)   | 5.84 (1.272, 10.418)*   |
| Healthy control                    | 10.86±6.39  | 10.06±5.29                           | 0.14                      | 0.80 (-1.887, 3.495)   |                         |
| Pressure pain thresholds (kPa)     |             |                                      |                           |                        |                         |
| Occiput                            |             |                                      |                           |                        |                         |
| Women with FM                      |             |                                      |                           |                        |                         |
| D                                  | 0.73±0.47   | 0.90±0.57                            | 0.32                      | -0.17 (-0.433, 0.084)  | -1.75 (-2.368, -1.142)* |
| ND                                 | 0.74±0.58   | 0.90±0.53                            | 0.29                      | -0.16 (-0.437, 0.118)  | -1.16 (-1.810, -0.516)* |
| Healthy control                    |             |                                      |                           |                        |                         |
| D                                  | 3.51±1.20   | 1.93±0.86                            | 1.51                      | 1.58 (0.877, 2.284)    |                         |
| ND                                 | 3.09±0.99   | 2.09±1.28                            | 0.87                      | 1.00 (0.265, 1.742)    |                         |
| Trapezius                          |             |                                      |                           |                        |                         |
| Women with FM                      |             |                                      |                           |                        |                         |
| D                                  | 0.75±0.50   | 0.88±0.66                            | 0.22                      | -0.13 (-0.347, 0.087)  | -0.87 (-1.642, -0.104)* |
| ND                                 | 0.75±0.47   | 0.87±0.55                            | 0.23                      | -0.12 (-0.303, 0.055)  | -0.85 (-1.650, -0.057)* |
| Healthy control                    |             |                                      |                           |                        |                         |
| D                                  | 3.39±1.51   | 2.65±1.20                            | 0.54                      | 0.74 (-0.233, 1.719)   |                         |
| ND                                 | 3.36±1.49   | 2.63±1.45                            | 0.50                      | 0.73 (-0.308, 1.767)   |                         |

Table S1. *Cont.*

|                            | Baseline  | Post-treatment (Post-radiofrequency) | Within-group<br>Cohen's d | Score change         |                         |
|----------------------------|-----------|--------------------------------------|---------------------------|----------------------|-------------------------|
|                            |           |                                      |                           | Within-group         | Between-group           |
| <b>Zygapophyseal joint</b> |           |                                      |                           |                      |                         |
| Women with FM              |           |                                      |                           |                      |                         |
| D                          | 1.01±0.71 | 0.84±0.55                            | 0.27                      | 0.17 (-0.087, 0.428) | -0.90 (-1.696, -0.103)  |
| ND                         | 0.93±0.66 | 0.87±0.68                            | 0.09                      | 0.06 (-0.221, 0.339) | -0.96 (-1.870, -0.044)  |
| Healthy control            |           |                                      |                           |                      |                         |
| D                          | 3.21±1.85 | 2.14±0.96                            | 0.73                      | 1.07 (0.082, 2.058)  |                         |
| ND                         | 3.33±2.12 | 2.32±1.24                            | 0.58                      | 1.02 (-0.128, 2.160) |                         |
| <b>Supraspinatus</b>       |           |                                      |                           |                      |                         |
| Women with FM              |           |                                      |                           |                      |                         |
| D                          | 1.04±0.77 | 0.76±0.49                            | 0.43                      | 0.28 (0.042, 0.524)  | -0.37 (-1.355, 0.607)   |
| ND                         | 1.08±0.66 | 0.76±0.49                            | 0.55                      | 0.32 (0.035, 0.601)  | -0.56 (-1.510, 0.390)   |
| Healthy control            |           |                                      |                           |                      |                         |
| D                          | 3.82±2.02 | 3.16±1.89                            | 0.34                      | 0.66 (-0.629, 1.944) |                         |
| ND                         | 3.93±1.83 | 3.05±1.67                            | 0.50                      | 0.88 (-0.318, 2.074) |                         |
| <b>Second rib</b>          |           |                                      |                           |                      |                         |
| Women with FM              |           |                                      |                           |                      |                         |
| D                          | 0.75±0.46 | 0.65±0.38                            | 0.24                      | 0.10 (-0.078, 0.278) | -0.40 (-0.873, 0.081)   |
| ND                         | 0.78±0.56 | 0.59±0.32                            | 0.42                      | 0.19 (-0.014, 0.390) | -0.46 (-1.010, 0.092)   |
| Healthy control            |           |                                      |                           |                      |                         |
| D                          | 2.48±1.16 | 1.98±1.10                            | 0.44                      | 0.50 (-0.075, 1.068) |                         |
| ND                         | 2.52±1.00 | 1.87±0.90                            | 0.68                      | 0.65 (-0.016, 1.310) |                         |
| <b>Epicondyle</b>          |           |                                      |                           |                      |                         |
| Women with FM              |           |                                      |                           |                      |                         |
| D                          | 0.79±0.52 | 0.78±0.53                            | 0.02                      | 0.01 (-0.217, 0.240) | -1.18 (-1.895, -0.475)* |
| ND                         | 0.76±0.49 | 0.65±0.42                            | 0.24                      | 0.11 (-0.114, 0.344) | -1.21 (-1.946, -0.468)  |
| Healthy control            |           |                                      |                           |                      |                         |
| D                          | 3.56±1.36 | 2.36±1.27                            | 0.91                      | 1.20 (0.316, 2.078)  |                         |
| ND                         | 3.82±1.60 | 2.49±1.44                            | 0.87                      | 1.32 (0.399, 2.246)  |                         |

Table S1. *Cont.*

|                           | Baseline  | Post-treatment (Post-radiofrequency) | Within-group<br>Cohen's d | Score change           |                         |
|---------------------------|-----------|--------------------------------------|---------------------------|------------------------|-------------------------|
|                           |           |                                      |                           | Within-group           | Between-group           |
| <b>Gluteus</b>            |           |                                      |                           |                        |                         |
| Women with FM             |           |                                      |                           |                        |                         |
| D                         | 1.42±0.94 | 1.90±1.46                            | 0.39                      | -0.48 (-0.864, -0.095) | -1.48 (-3.077, 0.114)*  |
| ND                        | 1.57±0.98 | 1.90±1.31                            | 0.28                      | -0.33 (-0.727, 0.075)  | -0.92 (-2.407, 0.570)*  |
| Healthy control           |           |                                      |                           |                        |                         |
| D                         | 6.78±2.74 | 5.78±2.75                            | 0.36                      | 1.00 (-1.063, 3.067)   |                         |
| ND                        | 6.37±2.26 | 5.77±3.05                            | 0.22                      | 0.59 (-1.309, 2.495)   |                         |
| <b>Greater trochanter</b> |           |                                      |                           |                        |                         |
| Women with FM             |           |                                      |                           |                        |                         |
| D                         | 1.86±1.09 | 1.63±0.93                            | 0.23                      | 0.23 (-0.122, 0.586)   | -0.74 (-2.094, 0.612)   |
| ND                        | 1.93±1.09 | 1.52±0.84                            | 0.42                      | 0.41 (-0.030, 0.853)   | -0.70 (-1.928, 0.522)   |
| Healthy control           |           |                                      |                           |                        |                         |
| D                         | 6.13±2.51 | 5.16±2.23                            | 0.41                      | 0.97 (-0.763, 2.709)   |                         |
| ND                        | 6.12±2.29 | 5.00±1.97                            | 0.52                      | 1.11 (-0.367, 2.596)   |                         |
| <b>Knee</b>               |           |                                      |                           |                        |                         |
| Women with FM             |           |                                      |                           |                        |                         |
| D                         | 1.28±0.98 | 1.18±0.82                            | 0.11                      | 0.10 (-0.313, 0.518)   | -1.97 (-3.158, -0.779)  |
| ND                        | 1.49±0.83 | 1.26±1.13                            | 0.23                      | 0.23 (-0.224, 0.694)   | -1.51 (-2.828, -0.194)* |
| Healthy control           |           |                                      |                           |                        |                         |
| D                         | 6.51±2.47 | 4.44±2.25                            | 0.88                      | 2.07 (0.621, 3.521)    |                         |
| ND                        | 6.24±2.31 | 4.50±2.24                            | 0.76                      | 0.75 (0.140, 3.352)    |                         |
| <b>Second metacarpal</b>  |           |                                      |                           |                        |                         |
| Women with FM             |           |                                      |                           |                        |                         |
| D                         | 0.97±0.52 | 0.99±0.70                            | 0.03                      | -0.02 (-0.303, 0.261)  | -1.26 (-1.975, -0.553)  |
| ND                        | 0.93±0.49 | 0.84±0.59                            | 0.17                      | 0.09 (-0.198, 0.371)   | -1.17 (-1.839, -0.496)* |
| Healthy control           |           |                                      |                           |                        |                         |
| D                         | 3.69±1.30 | 2.44±1.39                            | 0.93                      | 1.24 (0.407, 2.078)    |                         |
| ND                        | 3.50±1.25 | 2.24±1.22                            | 1.02                      | 1.25 (0.484, 2.025)    |                         |

**Table S1.** *Cont.*

|                        |    | Baseline  | Post-treatment (Post-radiofrequency) | Within-group<br>Cohen's d | Score change          |                        |
|------------------------|----|-----------|--------------------------------------|---------------------------|-----------------------|------------------------|
|                        |    |           |                                      |                           | Within-group          | Between-group          |
| <b>Anterior tibial</b> |    |           |                                      |                           |                       |                        |
| Women with FM          |    |           |                                      |                           |                       |                        |
|                        | D  | 1.37±0.99 | 1.39±0.85                            | 0.02                      | -0.02 (-0.407, 0.359) | -0.71 (-1.828, 0.411)* |
|                        | ND | 1.61±1.10 | 1.14±0.69                            | 0.51                      | 0.47 (0.046, 0.893)   | -0.67 (-1.927, 0.577)* |
| Healthy control        |    |           |                                      |                           |                       |                        |
|                        | D  | 5.30±2.29 | 4.61±2.07                            | 0.32                      | 0.68 (-0.687, 2.056)  |                        |
|                        | ND | 5.43±2.19 | 4.29±2.14                            | 0.53                      | 1.14 (-0.393, 2.682)  |                        |

\* Significant group × time interaction (analysis of variance,  $P < 0.05$ ).

Note. Values are expressed as means ± standard deviation (SD) for baseline and post radiofrequency application, and as means (95% confidence interval) for within-group and between-group score changes. Abbreviations. VAS: visual analog pain scale; FM: Fibromyalgia; mA: milliamps; kPa: kilopascal; D: dominant; ND: non-dominant.

**Table S2.** Baseline, post radiofrequency data, and the changes produced in each group (95% confidence interval) for core body temperature, axillary temperature and peripheral temperatures of palm sites of both hands.

|                              | Baseline   | Post-treatment (Post-radiofrequency) | Within-group<br>Cohen's d | Score change          |                        |
|------------------------------|------------|--------------------------------------|---------------------------|-----------------------|------------------------|
|                              |            |                                      |                           | Within-group          | Between-group          |
| Tympanic temperature (°C)    |            |                                      |                           |                       |                        |
| Women with FM                | 35.86±0.71 | 36.08±0.51                           | 0.36                      | -0.22 (-0.486, 0.045) | 0.78 (-1.232, -0.334)* |
| Healthy control              | 35.87±0.58 | 35.31±0.49                           | 1.04                      | 0.56 (0.166, 0.959)   |                        |
| Axillary temperature (°C)    |            |                                      |                           |                       |                        |
| Women with FM                | 35.46±0.73 | 35.51±0.90                           | 0.06                      | -0.52 (-0.442, 0.338) | 0.89 (-1.585, -0.204)* |
| Healthy control              | 35.58±0.71 | 34.74±0.76                           | 1.14                      | 0.84 (0.205, 1.480)   |                        |
| Palmar sites of both hands   |            |                                      |                           |                       |                        |
| Thumb fingertip maximum (°C) |            |                                      |                           |                       |                        |
| Women with FM                |            |                                      |                           |                       |                        |
| D                            | 32.05±3.12 | 32.35±3.10                           | 0.10                      | -0.30 (-1.823, 1.223) | -2.12 (-4.425, 0.187)  |
| ND                           | 31.83±2.97 | 32.17±3.02                           | 0.11                      | -0.34 (1-839, 1.153)  | -1.72 (-4.129, 0.683)* |
| Healthy control              |            |                                      |                           |                       |                        |
| D                            | 30.18±3.31 | 28.36±3.45                           | 0.54                      | 1.82 (0.181, 3.457)   |                        |
| ND                           | 30.11±3.83 | 28.73±3.20                           | 0.39                      | 1.38 (-0.528, 3.288)  |                        |
| Thumb fingertip minimum (°C) |            |                                      |                           |                       |                        |
| Women with FM                |            |                                      |                           |                       |                        |
| D                            | 31.05±3.06 | 31.70±3.09                           | 0.21                      | -0.66 (-2.147, 0.833) | -2.08 (-4.385, 0.221)  |
| ND                           | 30.72±2.97 | 31.56±3.01                           | 0.28                      | -0.84 (-2.357, 0.686) | -1.52 (-3.988, 0.957)  |
| Healthy control              |            |                                      |                           |                       |                        |
| D                            | 28.90±3.32 | 27.47±3.40                           | 0.43                      | 1.42 (-0.305, 3.155)  |                        |
| ND                           | 28.53±3.21 | 27.85±3.15                           | 0.21                      | 0.68 (-1.331, 2.691)  |                        |
| Thumb fingertip average (°C) |            |                                      |                           |                       |                        |
| Women with FM                |            |                                      |                           |                       |                        |
| D                            | 31.66±3.07 | 32.05±3.08                           | 0.13                      | -0.39 (-1.865, 1.079) | -2.05 (-4.305, 0.206)  |
| ND                           | 31.43±2.96 | 31.89±3.04                           | 0.15                      | -0.46 (-1.949, 1.034) | -1.78 (-4.175, 0.620)  |
| Healthy control              |            |                                      |                           |                       |                        |
| D                            | 29.57±3.29 | 27.91±3.43                           | 0.49                      | 1.66 (-0.001, 3.314)  |                        |
| ND                           | 29.65±3.71 | 28.33±3.24                           | 0.38                      | 1.32 (-0.581,3.221)   |                        |

Table S2. *Cont.*

|                               | Baseline   | Post-treatment (Post-radiofrequency) | Within-group<br>Cohen's d | Score change          |                         |
|-------------------------------|------------|--------------------------------------|---------------------------|-----------------------|-------------------------|
|                               |            |                                      |                           | Within-group          | Between-group           |
| Index fingertip maximum (°C)  |            |                                      |                           |                       |                         |
| Women with FM                 |            |                                      |                           |                       |                         |
| D                             | 31.69±3.27 | 32.30±3.10                           | 0.19                      | -0.61 (-2.162, 0.941) | -2.40 (-4.811, 0.002)*  |
| ND                            | 31.35±3.18 | 31.78±3.33                           | 0.13                      | -0.43 (-2.075, 1.218) | -1.70 (-4.248, 0.841)   |
| Healthy control               |            |                                      |                           |                       |                         |
| D                             | 29.55±3.61 | 27.76±3.58                           | 0.50                      | 1.79 (-0.030, 3.618)  |                         |
| ND                            | 29.10±3.99 | 27.82±3.50                           | 0.34                      | 1.27 (-0.636, 3.186)  |                         |
| Index fingertip minimum (°C)  |            |                                      |                           |                       |                         |
| Women with FM                 |            |                                      |                           |                       |                         |
| D                             | 30.86±3.12 | 31.56±3.15                           | 0.22                      | -0.70 (-2.231, 0.824) | -2.44 (-4.797, -0.085)* |
| ND                            | 30.09±3.06 | 28.30±3.85                           | 0.51                      | -1.02 (-2.590, 0.540) | -2.46 (-4.889, -0.023)* |
| Healthy control               |            |                                      |                           |                       |                         |
| D                             | 28.61±3.54 | 26.87±3.44                           | 0.50                      | 1.74 (-0.023, 3.498)  |                         |
| ND                            | 28.30±3.85 | 26.87±3.26                           | 0.40                      | 1.43 (-0.423, 3.286)  |                         |
| Index fingertip average (°C)  |            |                                      |                           |                       |                         |
| Women with FM                 |            |                                      |                           |                       |                         |
| D                             | 32.10±3.29 | 32.53±3.11                           | 0.13                      | -0.43 (-2.130, 1.266) | -2.39 (-4.762, -0.020)* |
| ND                            | 30.87±3.15 | 31.43±3.34                           | 0.17                      | -0.56 (-2.190, 1.076) | -1.88 (-4.400, 0.648)   |
| Healthy control               |            |                                      |                           |                       |                         |
| D                             | 30.12±3.59 | 28.62±3.64                           | 0.41                      | 1.49 (-0.151, 3.140)  |                         |
| ND                            | 28.69±3.96 | 27.37±3.42                           | 0.36                      | 1.32 (-0.578, 3.216)  |                         |
| Middle fingertip maximum (°C) |            |                                      |                           |                       |                         |
| Women with FM                 |            |                                      |                           |                       |                         |
| D                             | 31.33±3.29 | 31.88±3.23                           | 0.17                      | -0.55 (-2.084, 0.976) | -2.05 (-4.458, 0.356)   |
| ND                            | 31.28±3.31 | 31.65±3.32                           | 0.11                      | -0.36 (-2.044, 1.315) | -2.02 (-4.609, 0.568)   |
| Healthy control               |            |                                      |                           |                       |                         |
| D                             | 28.79±3.85 | 27.29±3.49                           | 0.41                      | 1.50 (-0.379, 3.379)  |                         |
| ND                            | 29.03±3.99 | 27.37±3.59                           | 0.44                      | 1.66 (-0.275, 3.587)  |                         |

Table S2. *Cont.*

|                               | Baseline   | Post-treatment (Post-radiofrequency) | Within-group<br>Cohen's d | Score change          |                       |
|-------------------------------|------------|--------------------------------------|---------------------------|-----------------------|-----------------------|
|                               |            |                                      |                           | Within-group          | Between-group         |
| Middle fingertip minimum (°C) |            |                                      |                           |                       |                       |
| Women with FM                 |            |                                      |                           |                       |                       |
| D                             | 30.41±3.16 | 31.19±3.29                           | 0.24                      | -0.78 (-2.283, 0.726) | 1.17 (-4.458, 0.264)  |
| ND                            | 30.33±3.18 | 30.92±3.40                           | 0.18                      | -0.59 (-2.225, 1.046) | -1.81 (-4.318, 0.690) |
| Healthy control               |            |                                      |                           |                       |                       |
| D                             | 27.84±3.65 | 26.51±3.38                           | 0.38                      | 1.32 (-0.521, 3.158)  |                       |
| ND                            | 27.91±3.85 | 26.68±3.54                           | 0.33                      | 1.22 (-0.611, 3.061)  |                       |
| Middle fingertip average (°C) |            |                                      |                           |                       |                       |
| Women with FM                 |            |                                      |                           |                       |                       |
| D                             | 30.86±3.24 | 31.51±3.27                           | 0.20                      | -0.65 (-2.176, 0.869) | -2.03 (-4.415, 0.358) |
| ND                            | 30.86±3.25 | 31.25±3.36                           | 0.12                      | -0.39 (-2.061, 1.275) | -1.83 (-4.396, 0.735) |
| Healthy control               |            |                                      |                           |                       |                       |
| D                             | 28.30±3.74 | 26.92±3.46                           | 0.38                      | 1.37 (-0.480, 3.230)  |                       |
| ND                            | 28.45±3.93 | 27.01±3.57                           | 0.38                      | 1.44 (-0.468, 3.342)  |                       |
| Ring fingertip maximum (°C)   |            |                                      |                           |                       |                       |
| Women with FM                 |            |                                      |                           |                       |                       |
| D                             | 31.44±3.32 | 31.80±3.44                           | 0.11                      | -0.37 (-1.963, 1.227) | -1.61 (-4.130, 0.907) |
| ND                            | 31.51±3.53 | 31.62±3.57                           | 0.03                      | -0.11 (-1.944, 1.723) | -1.50 (-4.299, 1.302) |
| Healthy control               |            |                                      |                           |                       |                       |
| D                             | 28.76±3.95 | 27.51±3.72                           | 0.33                      | 1.24 (-0.747, 3.235)  |                       |
| ND                            | 28.97±4.29 | 27.59±3.64                           | 0.35                      | 1.39 (-0.652, 3.427)  |                       |
| Ring fingertip minimum (°C)   |            |                                      |                           |                       |                       |
| Women with FM                 |            |                                      |                           |                       |                       |
| D                             | 30.42±3.27 | 31.06±3.37                           | 0.19                      | -0.64 (-2.204, 0.918) | -1.71 (-4.159, 0.736) |
| ND                            | 30.32±3.39 | 30.71±3.51                           | 0.11                      | -0.39 (-2.116, 1.330) | -1.33 (-3.976, 1.316) |
| Healthy control               |            |                                      |                           |                       |                       |
| D                             | 27.74±3.84 | 26.67±3.51                           | 0.29                      | 1.07 (-0.834, 2.972)  |                       |
| ND                            | 27.57±4.06 | 26.64±3.38                           | 0.25                      | 0.94 (-1.019, 2.894)  |                       |

Table S2. *Cont.*

|                               | Baseline   | Post-treatment (Post-<br>radiofrequency) | Within-group<br>Cohen's d | Score change          |                       |
|-------------------------------|------------|------------------------------------------|---------------------------|-----------------------|-----------------------|
|                               |            |                                          |                           | Within-group          | Between-group         |
| Ring fingertip average (°C)   |            |                                          |                           |                       |                       |
| Women with FM                 |            |                                          |                           |                       |                       |
| D                             | 30.93±3.30 | 31.42±3.40                               | 0.15                      | -0.49 (-2.070, 1.084) | -1.60 (-4.091, 0.893) |
| ND                            | 30.84±3.49 | 31.15±3.52                               | 0.09                      | -0.31 (-2.089, 1.468) | -1.45 (-4.169, 1.273) |
| Healthy control               |            |                                          |                           |                       |                       |
| D                             | 28.22±3.91 | 27.12±3.64                               | 0.29                      | 1.11 (-0.866, 3.079)  |                       |
| ND                            | 28.24±4.12 | 27.10±3.55                               | 0.30                      | 1.14 (-0.853, 3.128)  |                       |
| Pinkie fingertip maximum (°C) |            |                                          |                           |                       |                       |
| Women with FM                 |            |                                          |                           |                       |                       |
| D                             | 31.54±3.59 | 31.79±3.66                               | 0.07                      | -0.25 (-1.993, 1.485) | -1.55 (-4.226, 1.131) |
| ND                            | 31.57±3.54 | 31.53±3.84                               | 0.01                      | 0.04 (-1.857, 1.935)  | -1.26 (-4.095, 1.574) |
| Healthy control               |            |                                          |                           |                       |                       |
| D                             | 28.66±4.01 | 27.37±3.81                               | 0.33                      | 1.29 (-0.702, 3.290)  |                       |
| ND                            | 28.72±4.16 | 27.41±3.64                               | 0.33                      | 1.30 (-0.637, 3.237)  |                       |
| Pinkie fingertip minimum (°C) |            |                                          |                           |                       |                       |
| Women with FM                 |            |                                          |                           |                       |                       |
| D                             | 30.20±3.34 | 31.06±3.65                               | 0.25                      | 0.86 (-2.541, 0.820)  | -2.06 (-4.649, 0.528) |
| ND                            | 30.24±3.38 | 30.68±3.82                               | 0.12                      | -0.44 (-2.209, 1.338) | -1.34 (-3.994, 1.310) |
| Healthy control               |            |                                          |                           |                       |                       |
| D                             | 27.68±3.85 | 26.48±3.56                               | 0.32                      | 1.20 (-0.727, 3.127)  |                       |
| ND                            | 27.46±3.95 | 26.55±3.38                               | 0.25                      | 0.91 (-0.905, 2.717)  |                       |
| Pinkie fingertip average (°C) |            |                                          |                           |                       |                       |
| Women with FM                 |            |                                          |                           |                       |                       |
| D                             | 30.97±3.55 | 31.41±3.66                               | 0.12                      | -0.44 (-2.149, 1.278) | -1.62 (-4.244, 1.010) |
| ND                            | 30.97±3.43 | 31.06±3.82                               | 0.02                      | -0.08 (-1.913, 1.749) | -1.08 (-3.834, 1.669) |
| Healthy control               |            |                                          |                           |                       |                       |
| D                             | 28.08±3.91 | 26.90±3.67                               | 0.31                      | 1.18 (-0.752, 3.114)  |                       |
| ND                            | 27.99±4.06 | 26.99±3.56                               | 0.26                      | 1.00 (-0.912, 2.912)  |                       |



Table S2. *Cont.*

|                              | Baseline   | Post-treatment (Post-radiofrequency) | Within-group<br>Cohen's d | Score change           |                         |
|------------------------------|------------|--------------------------------------|---------------------------|------------------------|-------------------------|
|                              |            |                                      |                           | Within-group           | Between-group           |
| Palm centre maximum(°C)      |            |                                      |                           |                        |                         |
| Women with FM                |            |                                      |                           |                        |                         |
| D                            | 34.18±1.32 | 34.58±1.27                           | 0.31                      | -0.40 (-1.061, 0.261)  | -1.41 (-2.471, -0.342)* |
| ND                           | 33.90±1.52 | 34.52±1.26                           | 0.44                      | -0.62 (-1.356, 0.106)  | -1.24 (-2.355, -0.133)* |
| Healthy control              |            |                                      |                           |                        |                         |
| D                            | 33.27±1.61 | 32.27±2.15                           | 0.53                      | 1.01 (0.132, 1.881)    |                         |
| ND                           | 32.81±1.75 | 32.19±2.21                           | 0.31                      | 0.62 (-0.178, 1.415)   |                         |
| Palm centre minimum (°C)     |            |                                      |                           |                        |                         |
| Women with FM                |            |                                      |                           |                        |                         |
| D                            | 32.95±1.32 | 33.69±1.32                           | 0.56                      | -0.73 (-1.390, -0.074) | -1.46 (-2.495, -0.419)* |
| ND                           | 32.50±1.56 | 33.55±1.34                           | 0.72                      | -1.06 (-1.775, -0.339) | -1.72 (-2.895, -0.544)* |
| Healthy control              |            |                                      |                           |                        |                         |
| D                            | 31.61±1.70 | 30.88±2.05                           | 0.39                      | 0.72 (-0.092, 1.542)   |                         |
| ND                           | 31.26±1.82 | 30.60±2.10                           | 0.34                      | 0.66 (-0.334, 1.659)   |                         |
| Palm centre average (°C)     |            |                                      |                           |                        |                         |
| Women with FM                |            |                                      |                           |                        |                         |
| D                            | 33.65±1.29 | 34.15±1.30                           | 0.39                      | -0.50 (-1.137, 0.137)  | -1.37 (-2.395, -0.355)* |
| ND                           | 33.32±1.50 | 34.11±1.29                           | 0.56                      | -0.79 (-1.487, -0.084) | -1.41 (-2.493, -0.328)* |
| Healthy control              |            |                                      |                           |                        |                         |
| D                            | 32.58±1.56 | 31.71±2.06                           | 0.48                      | 0.87 (0.046, 1.704)    |                         |
| ND                           | 32.22±1.71 | 31.59±2.12                           | 0.33                      | 0.62 (-0.185, 1.435)   |                         |
| Thenar eminence maximum (°C) |            |                                      |                           |                        |                         |
| Women with FM                |            |                                      |                           |                        |                         |
| D                            | 33.84±1.30 | 34.12±1.51                           | 0.20                      | -0.28 (-1.003, 0.439)  | -1.99 (-3.191, -0.798)* |
| ND                           | 33.52±1.62 | 34.03±1.53                           | 0.32                      | -0.51 (-1.288, 0.259)  | -1.67 (-2.973, -0.368)* |
| Healthy control              |            |                                      |                           |                        |                         |
| D                            | 33.06±1.50 | 31.35±2.36                           | 0.86                      | 1.71 (0.673, 2.752)    |                         |
| ND                           | 32.46±1.80 | 31.30±2.32                           | 0.56                      | 1.16 (-0.001, 2.313)   |                         |

Table S2. *Cont.*

|                                  | Baseline   | Post-treatment (Post-radiofrequency) | Within-group<br>Cohen's d | Score change           |                         |
|----------------------------------|------------|--------------------------------------|---------------------------|------------------------|-------------------------|
|                                  |            |                                      |                           | Within-group           | Between-group           |
| Thenar eminence minimum (°C)     |            |                                      |                           |                        |                         |
| Women with FM                    |            |                                      |                           |                        |                         |
| D                                | 31.35±1.51 | 31.97±1.95                           | 0.35                      | -0.62 (-1.479, 0.237)  | -1.67 (-3.047, -0.296)* |
| ND                               | 31.22±1.67 | 31.75±2.00                           | 0.29                      | -0.53 (-1.481, 0.417)  | -1.56 (-2.044, -0.071)* |
| Healthy control                  |            |                                      |                           |                        |                         |
| D                                | 29.84±1.56 | 28.79±2.52                           | 0.50                      | 1.05 (-0.072, 2.172)   |                         |
| ND                               | 29.67±1.61 | 28.65±2.53                           | 0.48                      | 1.02 (-0.128, 2.178)   |                         |
| Thenar eminence average (°C)     |            |                                      |                           |                        |                         |
| Women with FM                    |            |                                      |                           |                        |                         |
| D                                | 32.50±1.32 | 32.89±1.81                           | 0.25                      | -0.39 (-1.191, 0.406)  | -1.85 (-3.110, -0.601)* |
| ND                               | 32.18±1.53 | 32.88±1.79                           | 0.42                      | -0.70 (-1.553, 0.153)  | -1.80 (-3.171,-0.429)*  |
| Healthy control                  |            |                                      |                           |                        |                         |
| D                                | 31.21±1.51 | 29.75±2.45                           | 0.72                      | 1.46 (0.482, 2.443)    |                         |
| ND                               | 30.83±1.68 | 29.73±2.47                           | 0.52                      | 1.10 (-0.022, 2.222)   |                         |
| Hypothenar eminence maximum (°C) |            |                                      |                           |                        |                         |
| Women with FM                    |            |                                      |                           |                        |                         |
| D                                | 33.82±1.52 | 34.19±1.52                           | 0.24                      | -0.37 (-1.189, 0.454)  | -0.86 (-2.151, 0.428)   |
| ND                               | 33.49±1.63 | 34.22±1.57                           | 0.46                      | -0.73 (-1.619, 0.154)  | -0.79 (-2.122, 0.546)   |
| Healthy control                  |            |                                      |                           |                        |                         |
| D                                | 32.64±1.48 | 32.14±2.37                           | 0.25                      | 0.49 (-0.511, 1.499)   |                         |
| ND                               | 32.31±1.68 | 32.26±2.55                           | 0.02                      | 0.06 (-0.874, 0.986)   |                         |
| Hypothenar eminence minimum (°C) |            |                                      |                           |                        |                         |
| Women with FM                    |            |                                      |                           |                        |                         |
| D                                | 30.89±1.94 | 31.89±1.51                           | 0.57                      | -1.00 (-1.871, -0.136) | -0.72 (-2.011, 0.579)   |
| ND                               | 30.12±2.23 | 32.12±1.61                           | 0.02                      | -1.99 (-3.025, -0.960) | -0.87 (-2.494, 0.758)   |
| Healthy control                  |            |                                      |                           |                        |                         |
| D                                | 28.87±1.78 | 29.16±2.30                           | 0.14                      | -0.29 (-1.168, 0.593)  |                         |
| ND                               | 28.12±2.08 | 29.24±2.28                           | 0.51                      | -1.12 (-2.403, 0.153)  |                         |

**Table S2.** *Cont.*

|                                  | Baseline   | Post-treatment (Post-radiofrequency) | Within-group<br>Cohen's d | Score change           |                       |
|----------------------------------|------------|--------------------------------------|---------------------------|------------------------|-----------------------|
|                                  |            |                                      |                           | Within-group           | Between-group         |
| Hypothenar eminence average (°C) |            |                                      |                           |                        |                       |
| Women with FM                    |            |                                      |                           |                        |                       |
| D                                | 32.30±1.77 | 32.83±1.60                           | 0.31                      | -0.53 (-1.399, 0.335)  | -0.96 (-2.229, 0.315) |
| ND                               | 32.00±1.85 | 33.00±1.59                           | 0.58                      | -1.00 (-1.911, -0.096) | -1.07 (-2.417, 0.272) |
| Healthy control                  |            |                                      |                           |                        |                       |
| D                                | 30.64±1.71 | 30.21±2.20                           | 0.22                      | 0.42 (-0.387, 1.237)   |                       |
| ND                               | 30.49±1.85 | 30.42±2.35                           | 0.03                      | 0.07 (-0.823, 0.961)   |                       |

\*Significant group × time interaction (analysis of variance,  $P < 0.05$ ).

Note. Values are expressed as means ± standard deviation (SD) for baseline and post radiofrequency application, and as means (95% confidence interval) for within-group and between-group score changes. Abbreviations. °C: Celsius degree; FM: Fibromyalgia; D: dominant; ND: non-dominant.

**Table S3.** Baseline, post radiofrequency data, and the changes produced in each group (95% confidence interval) for peripheral temperatures of dorsal sites of both hands.

|                              | Baseline   | Post-treatment (Post-radiofrequency) | Within-group<br>Cohen's d | Score change          |                       |
|------------------------------|------------|--------------------------------------|---------------------------|-----------------------|-----------------------|
|                              |            |                                      |                           | Within-group          | Between-group         |
| Dorsal sites of both hands   |            |                                      |                           |                       |                       |
| Thumb fingertip maximum (°C) |            |                                      |                           |                       |                       |
| Women with FM                |            |                                      |                           |                       |                       |
| D                            | 33.32±3.28 | 33.62±2.92                           | 0.10                      | -0.30 (-1.883, 1.290) | -1.74 (-4.084, 0.608) |
| ND                           | 33.19±3.11 | 33.30±3.04                           | 0.04                      | -0.11 (-1.751, 1.537) | -1.40 (-3.863, 1.061) |
| Healthy control              |            |                                      |                           |                       |                       |
| D                            | 31.58±3.48 | 30.13±3.75                           | 0.40                      | 1.44 (-0.202, 3.085)  |                       |
| ND                           | 31.22±3.53 | 29.93±3.67                           | 0.36                      | 1.29 (-0.490, 3.079)  |                       |
| Thumb fingertip minimum (°C) |            |                                      |                           |                       |                       |
| Women with FM                |            |                                      |                           |                       |                       |
| D                            | 31.73±3.00 | 32.36±2.98                           | 0.21                      | -0.63 (-2.165, 0.908) | -1.92 (-4.182, 0.336) |
| ND                           | 31.84±2.91 | 32.21±3.01                           | 0.12                      | -0.37 (-1.971, 1.228) | -1.81 (-4.192, 0.579) |
| Healthy control              |            |                                      |                           |                       |                       |
| D                            | 29.69±3.45 | 28.39±3.42                           | 0.38                      | 1.29 (-0.264, 2.852)  |                       |
| ND                           | 29.58±3.43 | 28.14±3.31                           | 0.43                      | 1.43 (-0.275, 3.145)  |                       |
| Thumb fingertip average (°C) |            |                                      |                           |                       |                       |
| Women with FM                |            |                                      |                           |                       |                       |
| D                            | 32.73±3.18 | 33.06±2.95                           | 0.11                      | -0.33 (-1.906, 1.249) | -1.68 (-4.015, 0.652) |
| ND                           | 32.63±3.04 | 32.79±3.02                           | 0.05                      | -0.15 (-1.778, 1.478) | -1.56 (-3.986, 0.867) |
| Healthy control              |            |                                      |                           |                       |                       |
| D                            | 30.73±3.50 | 29.38±3.64                           | 0.38                      | 1.35 (-0.284, 2.990)  |                       |
| ND                           | 30.51±3.51 | 29.10±3.48                           | 0.40                      | 1.41 (-0.342, 3.154)  |                       |

Table S3. *Cont.*

|                               | Baseline   | Post-treatment (Post-radiofrequency) | Within-group<br>Cohen's d | Score change          |                       |
|-------------------------------|------------|--------------------------------------|---------------------------|-----------------------|-----------------------|
|                               |            |                                      |                           | Within-group          | Between-group         |
| Index fingertip maximum (°C)  |            |                                      |                           |                       |                       |
| Women with FM                 |            |                                      |                           |                       |                       |
| D                             | 32.57±3.36 | 32.95±3.15                           | 0.12                      | -0.38 (-2.097, 1.340) | -1.76 (-4.280, 0.758) |
| ND                            | 32.26±3.30 | 32.59±3.29                           | 0.10                      | -0.32 (-2.071, 1.428) | -1.39 (-3.971, 1.187) |
| Healthy control               |            |                                      |                           |                       |                       |
| D                             | 30.65±3.57 | 29.27±3.73                           | 0.38                      | 1.38 (-0.339, 3.104)  |                       |
| ND                            | 30.19±3.89 | 29.12±3.60                           | 0.28                      | 1.07 (-0.720, 2.861)  |                       |
| Index fingertip minimum (°C)  |            |                                      |                           |                       |                       |
| Women with FM                 |            |                                      |                           |                       |                       |
| D                             | 31.36±3.15 | 32.01±3.11                           | 0.21                      | -0.65 (-2.306, 1.013) | -2.35 (-4.736, 0.032) |
| ND                            | 31.17±3.09 | 31.82±3.28                           | 0.20                      | -0.65 (-2.354, 1.054) | -1.99 (-4.477, 0.483) |
| Healthy control               |            |                                      |                           |                       |                       |
| D                             | 29.32±3.56 | 27.62±3.35                           | 0.49                      | 1.71 (0.179, 3.233)   |                       |
| ND                            | 28.81±3.70 | 27.46±3.18                           | 0.39                      | 1.35 (-0.311, 3.005)  |                       |
| Index fingertip average (°C)  |            |                                      |                           |                       |                       |
| Women with FM                 |            |                                      |                           |                       |                       |
| D                             | 32.10±3.29 | 32.53±3.11                           | 0.13                      | -0.43 (-2.130, 1.266) | -1.93 (-4.395, 0.543) |
| ND                            | 31.84±3.22 | 32.22±3.28                           | 0.12                      | -0.39 (-2.121, 1.343) | -1.57 (-4.108, 0.976) |
| Healthy control               |            |                                      |                           |                       |                       |
| D                             | 30.11±3.59 | 28.62±3.64                           | 0.41                      | 1.49 (-0.152, 3.140)  |                       |
| ND                            | 29.65±3.83 | 28.48±3.44                           | 0.32                      | 1.18 (-0.567, 2.920)  |                       |
| Middle fingertip maximum (°C) |            |                                      |                           |                       |                       |
| Women with FM                 |            |                                      |                           |                       |                       |
| D                             | 32.36±3.44 | 32.69±3.33                           | 0.10                      | -0.32 (-2.037, 1.394) | -1.65 (-4.182, 0.881) |
| ND                            | 32.26±3.35 | 32.41±3.29                           | 0.04                      | -0.15 (-1.937, 1.644) | -1.13 (-3.735, 1.465) |
| Healthy control               |            |                                      |                           |                       |                       |
| D                             | 30.42±3.65 | 29.09±3.74                           | 0.36                      | 1.33 (-0.433, 3.092)  |                       |
| ND                            | 30.06±3.64 | 29.07±3.65                           | 0.27                      | 0.99 (-0.738, 2.714)  |                       |

Table S3. *Cont.*

|                               | Baseline   | Post-treatment (Post-radiofrequency) | Within-group<br>Cohen's d | Score change          |                       |
|-------------------------------|------------|--------------------------------------|---------------------------|-----------------------|-----------------------|
|                               |            |                                      |                           | Within-group          | Between-group         |
| Middle fingertip minimum (°C) |            |                                      |                           |                       |                       |
| Women with FM                 |            |                                      |                           |                       |                       |
| D                             | 31.24±3.27 | 31.83±3.32                           | 0.18                      | -0.59 (-2.262, 1.076) | -2.07 (-4.474, 0.335) |
| ND                            | 31.16±3.25 | 31.70±3.36                           | 0.16                      | -0.54 (-2.310, 1.232) | -1.88 (-4.418, 0.657) |
| Healthy control               |            |                                      |                           |                       |                       |
| D                             | 29.01±3.43 | 27.53±3.36                           | 0.43                      | 1.48 (-0.078, 3.031)  |                       |
| ND                            | 28.88±3.70 | 27.54±3.37                           | 0.38                      | 1.34 (-0.267, 2.950)  |                       |
| Middle fingertip average (°C) |            |                                      |                           |                       |                       |
| Women with FM                 |            |                                      |                           |                       |                       |
| D                             | 31.94±3.38 | 32.27±3.29                           | 0.10                      | -0.34 (-2.043, 1.371) | -1.74 (-4.221, 0.750) |
| ND                            | 31.90±3.33 | 32.07±3.32                           | 0.05                      | -0.18 (-1.96, 1.608)  | -1.30 (-3.875, 1.282) |
| Healthy control               |            |                                      |                           |                       |                       |
| D                             | 29.86±3.60 | 28.46±3.60                           | 0.39                      | 1.40 (-0.265, 3.065)  |                       |
| ND                            | 29.58±3.66 | 28.46±3.59                           | 0.31                      | 1.12 (-0.560, 2.795)  |                       |
| Ring fingertip maximum (°C)   |            |                                      |                           |                       |                       |
| Women with FM                 |            |                                      |                           |                       |                       |
| D                             | 32.61±3.53 | 32.81±3.47                           | 0.06                      | -0.20 (-1.993, 1.593) | -1.43 (-4.117, 1.258) |
| ND                            | 32.20±3.55 | 32.34±3.49                           | 0.04                      | -1.14 (-2.067, 1.788) | -0.93 (-3.721, 1.854) |
| Healthy control               |            |                                      |                           |                       |                       |
| D                             | 30.23±3.84 | 29.00±3.87                           | 0.32                      | 1.23 (-0.723, 3.182)  |                       |
| ND                            | 29.84±3.86 | 29.05±3.70                           | 0.21                      | 0.79 (-1.031, 2.619)  |                       |
| Ring fingertip minimum (°C)   |            |                                      |                           |                       |                       |
| Women with FM                 |            |                                      |                           |                       |                       |
| D                             | 31.39±3.47 | 31.84±3.48                           | 0.13                      | -0.45 (-2.254, 1.354) | -1.96 (-4.561, 0.649) |
| ND                            | 31.05±3.48 | 31.47±3.46                           | 0.12                      | -0.42 (-2.341, 1.505) | -1.55 (-4.281, 1.175) |
| Healthy control               |            |                                      |                           |                       |                       |
| D                             | 28.81±3.59 | 27.30±3.48                           | 0.43                      | 1.51 (-0.193, 3.205)  |                       |
| ND                            | 28.51±3.88 | 27.38±3.39                           | 0.31                      | 1.13 (-0.534, 2.804)  |                       |

Table S3. *Cont.*

|                               | Baseline   | Post-treatment (Post-radiofrequency) | Within-group<br>Cohen's d | Score change          |                       |
|-------------------------------|------------|--------------------------------------|---------------------------|-----------------------|-----------------------|
|                               |            |                                      |                           | Within-group          | Between-group         |
| Ring fingertip average (°C)   |            |                                      |                           |                       |                       |
| Women with FM                 |            |                                      |                           |                       |                       |
| D                             | 32.10±3.48 | 32.30±3.43                           | 0.06                      | -0.20 (-1.992, 1.585) | -1.51 (-4.161, 1.142) |
| ND                            | 31.79±3.50 | 31.92±3.48                           | 0.04                      | -0.13 (-2.049, 1.785) | -1.06 (-3.807, 1.684) |
| Healthy control               |            |                                      |                           |                       |                       |
| D                             | 29.61±3.75 | 28.30±3.74                           | 0.35                      | 1.31 (-0.563, 3.175)  |                       |
| ND                            | 29.29±3.85 | 28.36±3.56                           | 0.25                      | 0.93 (-0.809, 2.668)  |                       |
| Pinkie fingertip maximum (°C) |            |                                      |                           |                       |                       |
| Women with FM                 |            |                                      |                           |                       |                       |
| D                             | 32.09±3.57 | 32.42±3.52                           | 0.09                      | -0.33 (-2.172, 1.508) | -1.50 (-4.187, 1.193) |
| ND                            | 32.04±3.46 | 32.06±3.70                           | 0.01                      | -0.02 (-1.966, 1.923) | -0.73 (-3.522, 2.056) |
| Healthy control               |            |                                      |                           |                       |                       |
| D                             | 29.70±3.92 | 28.53±3.62                           | 0.31                      | 1.16 (-0.660, 2.989)  |                       |
| ND                            | 29.48±3.91 | 28.77±3.48                           | 0.19                      | 0.71 (-1.065, 2.489)  |                       |
| Pinkie fingertip minimum (°C) |            |                                      |                           |                       |                       |
| Women with FM                 |            |                                      |                           |                       |                       |
| D                             | 30.64±3.37 | 31.54±3.55                           | 0.26                      | -0.90 (-2.703, 0.910) | -2.38 (-4.965, 0.196) |
| ND                            | 31.16±3.25 | 31.70±3.36                           | 0.16                      | -0.54 (-2.310, 1.232) | -1.51 (-4.169, 1.153) |
| Healthy control               |            |                                      |                           |                       |                       |
| D                             | 28.39±3.68 | 26.91±3.33                           | 0.42                      | 1.49 (-0.130, 3.106)  |                       |
| ND                            | 28.88±3.70 | 27.54±3.37                           | 0.38                      | 1.34 (-0.267, 2.950)  |                       |
| Pinkie fingertip average (°C) |            |                                      |                           |                       |                       |
| Women with FM                 |            |                                      |                           |                       |                       |
| D                             | 31.58±3.52 | 32.02±3.51                           | 0.12                      | -0.44 (-2.272, 1.393) | -1.84 (-4.484, 0.806) |
| ND                            | 31.54±3.40 | 31.68±3.73                           | 0.04                      | -0.14 (-2.070, 1.784) | -0.94 (-3.695, 1.809) |
| Healthy control               |            |                                      |                           |                       |                       |
| D                             | 29.22±3.85 | 27.82±3.48                           | 0.38                      | 1.40 (-0.322, 3.122)  |                       |
| ND                            | 28.93±3.85 | 28.13±3.39                           | 0.22                      | 0.80 (-0.924, 2.524)  |                       |

Table S3. Cont.

|                                   | Baseline   | Post-treatment (Post-radiofrequency) | Within-group<br>Cohen's d | Score change           |                         |
|-----------------------------------|------------|--------------------------------------|---------------------------|------------------------|-------------------------|
|                                   |            |                                      |                           | Within-group           | Between-group           |
| <b>Dorsal centre maximum(°C)</b>  |            |                                      |                           |                        |                         |
| Women with FM                     |            |                                      |                           |                        |                         |
| D                                 | 32.84±1.38 | 33.89±1.27                           | 0.79                      | -1.04 (-1.684, -0.401) | -1.45 (-2.497, -0.400)* |
| ND                                | 32.36±1.61 | 33.68±1.28                           | 0.91                      | -1.32 (-2.059, -0.584) | -1.30 (-2.487, -0.120)* |
| Healthy control                   |            |                                      |                           |                        |                         |
| D                                 | 31.86±1.82 | 31.46±2.04                           | 0.21                      | 0.41 (-0.494, 1.306)   |                         |
| ND                                | 31.61±1.92 | 31.63±2.11                           | 0.01                      | -0.18 (-1.005, 0.970)  |                         |
| <b>Dorsal centre minimum (°C)</b> |            |                                      |                           |                        |                         |
| Women with FM                     |            |                                      |                           |                        |                         |
| D                                 | 31.51±1.64 | 33.07±1.31                           | 1.05                      | -1.56 (-2.288, -0.841) | -2.00 (-3.143, -0.868)* |
| ND                                | 31.29±1.76 | 32.84±1.32                           | 0.99                      | -1.56 (-2.309, -0.805) | -1.71 (-2.895, -0.525)* |
| Healthy control                   |            |                                      |                           |                        |                         |
| D                                 | 30.82±1.81 | 30.38±2.08                           | 0.23                      | 0.44 (-0.474, 1.356)   |                         |
| ND                                | 30.59±1.85 | 30.43±2.03                           | 0.08                      | 0.15 (-0.806, 1.112)   |                         |
| <b>Dorsal centre average (°C)</b> |            |                                      |                           |                        |                         |
| Women with FM                     |            |                                      |                           |                        |                         |
| D                                 | 32.25±1.50 | 33.46±1.29                           | 0.86                      | -1.21 (-1.898, -0.516) | -1.64 (-2.749, -0.536)* |
| ND                                | 31.85±1.70 | 33.25±1.28                           | 0.93                      | -1.41 (-2.147, -0.668) | -1.50 (-2.661, -0.342)* |
| Healthy control                   |            |                                      |                           |                        |                         |
| D                                 | 31.37±1.79 | 30.93±2.09                           | 0.23                      | 0.43 (-0.484, 1.354)   |                         |
| ND                                | 31.12±1.88 | 31.02±2.03                           | 0.05                      | 0.09 (-0.834, 1.022)   |                         |

\*Significant group × time interaction (analysis of variance,  $P < 0.05$ ).

Note. Values are expressed as means ± standard deviation (SD) for baseline and post radiofrequency application, and as means (95% confidence interval) for within-group and between-group score changes. Abbreviations. °C: Celsius degree; FM: Fibromyalgia; D: dominant; ND: non-dominant.
